# Supplementary material for: Catalytic synthesis and growth mechanism of SiC@SiO2 nanowires and their photoluminescence properties
Source: Royal Society of Chemistry journal article supplement (doi:10.1039/c3ce41581c), 2013-01-01
Supplement: c3ce41581c.pdf [file c3ce41581c.pdf]

## Electronic Supplementary Information

**Manuscript ID:** CE-ART-04-2013-040586

**Manuscript Title:** Catalytic synthesis and growth mechanism of SiC@SiO<sub>2</sub> nanowires and their photoluminescence properties

**Authors:** Kai Chen, Minghao Fang, Zhaohui Huang, Juntong Huang and Yan-gai Liu

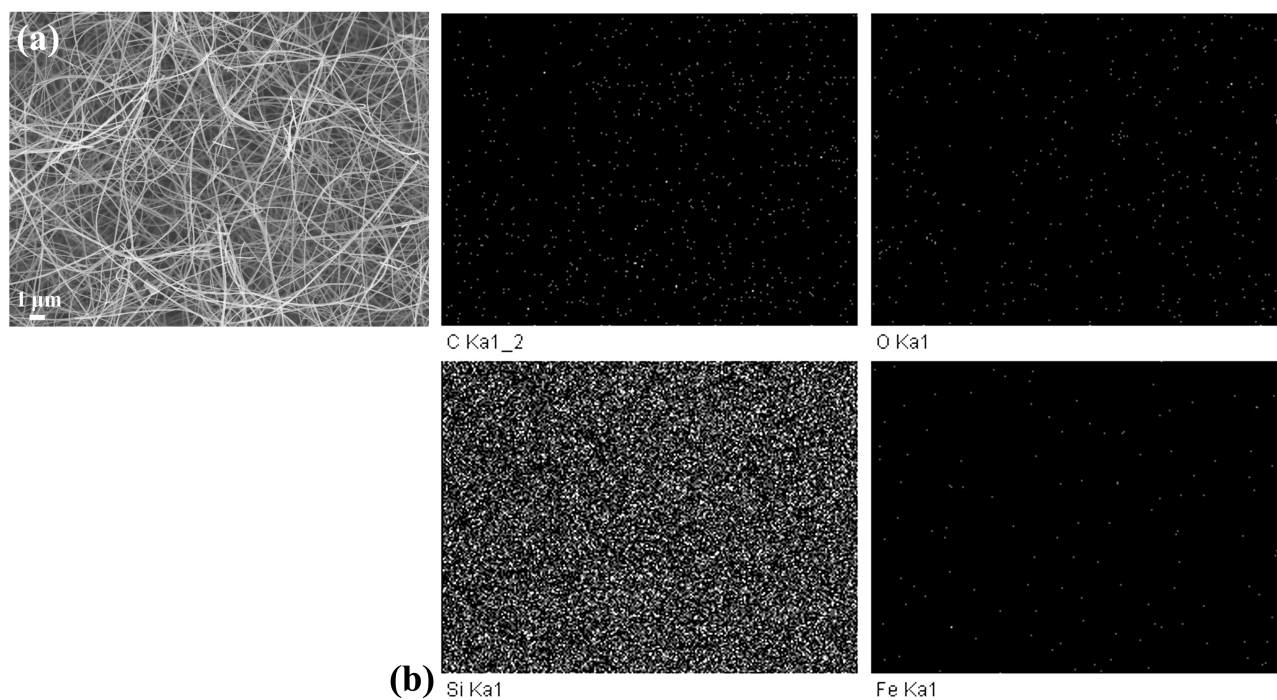

**Fig. S1.** (a) FESEM image and (b) mapping EDS results of the as-formed nanowires.

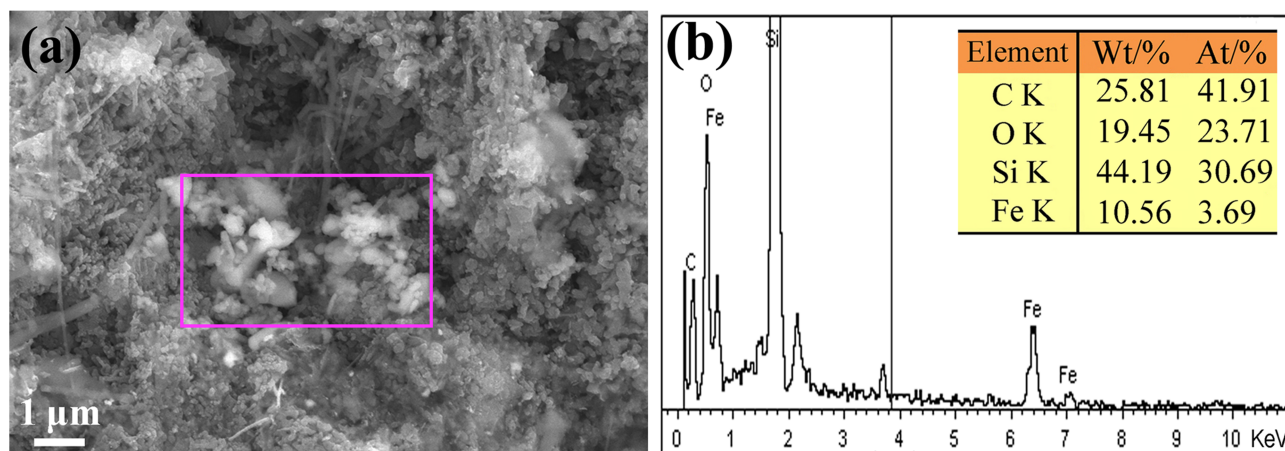

**Fig. S2.** (a) FESEM image and (b) EDS pattern of the cross-section areas on the Si substrate.
